# Supplementary material
Source: publisher figshare collection journal article supplement (https://frontiersin.figshare.com/ndownloader/files/28396269)
Supplement: Supplementary file [file 28396269]

## Supplemental Figure 1

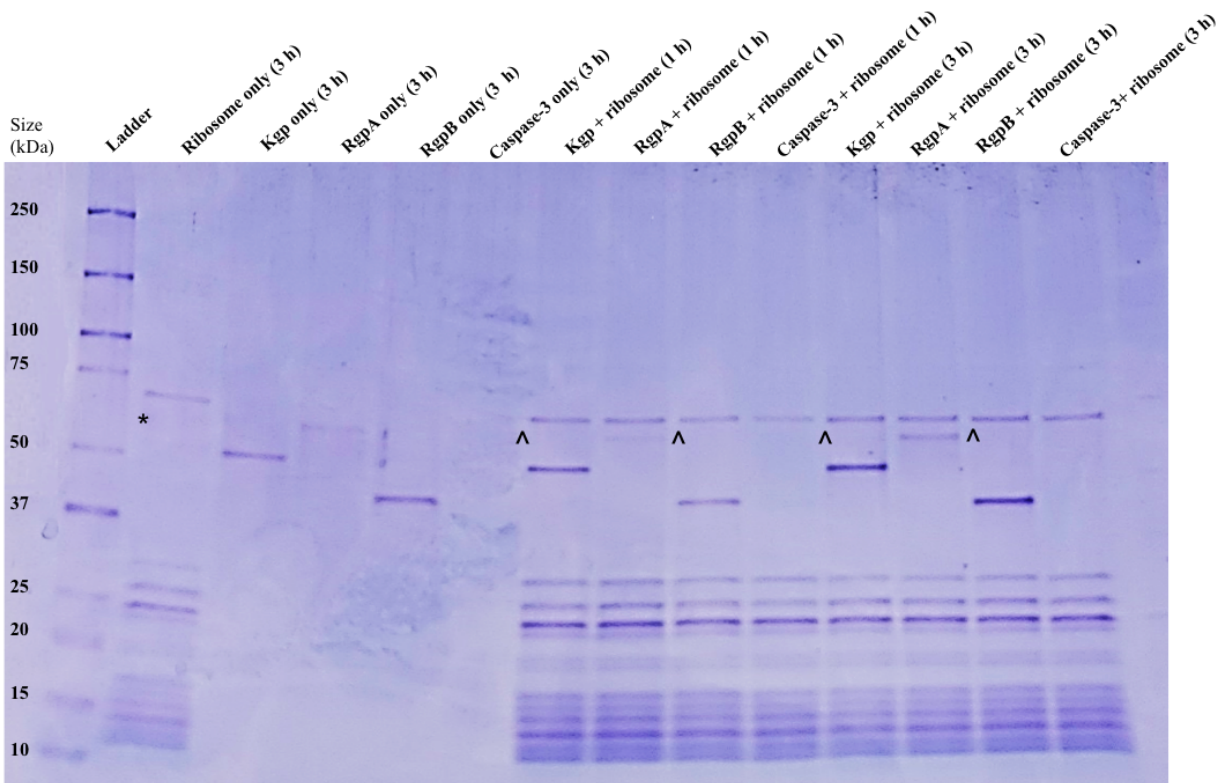

Supplemental Figure 1: Gingipain digestion of 70S ribosomes. Fifteen microliter reactions containing 2.5 ug of 70S ribosome and either 120 nM of recombinant Lys-gingipain (rKgp), Arg-gingipains (rRgpA and rRgpB), or about 206 – 412  $\mu$ M (one unit in a 15  $\mu$ L reaction volume) of Caspase-3 were incubated at 30°C for 1 h or 3 h. After incubation, results were visualized using SDS PAGE & Coomassie brilliant blue staining. The Precision Plus Protein WesternC Dual Color ladder was used for band sizing. The asterisk (\*) to the left of the ribosome only control indicates a faint band present at about 60 kDa. This faint band appeared to be digested by Kgp and RgpB after 1 and 3 hours of incubation, as indicated by carets (^) to the left of the Kgp and RgpB.
